# Supplementary material for: Aging Does Not Affect Beta Modulation during Reaching Movements
Source: Hindawi journal article supplement (doi:10.1155/2019/1619290), 2019-05-15
Supplement: f1 [file 1619290.f1.pdf]

## Supplementary Materials

Supplementary Table 1: Correlations between Behavioral parameters and age

| <i>ΔINDEX VS AGE</i>  | <b>R<sup>2</sup></b> | <b>P</b>     |
|-----------------------|----------------------|--------------|
| Reaction time         | 0.00                 | 0.853        |
| Peak velocity         | 0.02                 | 0.490        |
| <b>Hand path area</b> | <b>0.29</b>          | <b>0.005</b> |
| Total movement time   | 0.04                 | 0.330        |
| <i>Left ROI</i>       |                      |              |
| ERD magnitude         | 0.03                 | 0.384        |
| ERS magnitude         | 0.05                 | 0.286        |
| ERD peak latency      | 0.01                 | 0.722        |
| ERS peak latency      | 0.08                 | 0.177        |
| <i>Frontal ROI</i>    |                      |              |
| ERD magnitude         | 0.12                 | 0.085        |
| ERS magnitude         | 0.03                 | 0.400        |
| ERD peak latency      | 0.01                 | 0.612        |
| ERS peak latency      | 0.09                 | 0.143        |

Supplementary Table 2: Results of the Mixed Model ANOVA for ERD, ERS, and beta modulation comparing groups across practice in the two ROIs.

|                    | <b>Group</b> |          | <b>Practice</b> |                  | <b>GroupXPractice</b> |          |
|--------------------|--------------|----------|-----------------|------------------|-----------------------|----------|
|                    | <b>F</b>     | <b>P</b> | <b>F</b>        | <b>P</b>         | <b>F</b>              | <b>P</b> |
| <i>Left ROI</i>    |              |          |                 |                  |                       |          |
| ERD                | 0.52         | 0.477    | 1.36            | 0.246            | 0.65                  | 0.664    |
| ERS                | 1.76         | 0.197    | <b>7.71</b>     | <b>&lt;0.001</b> | 0.63                  | 0.666    |
| Beta Modulation    | 1.72         | 0.203    | <b>7.95</b>     | <b>&lt;0.001</b> | 0.68                  | 0.661    |
| <i>Frontal ROI</i> |              |          |                 |                  |                       |          |
| ERD                | 1.09         | 0.308    | <b>3.43</b>     | <b>&lt;0.001</b> | 0.75                  | 0.591    |
| ERS                | 0.00         | 0.959    | <b>6.19</b>     | <b>&lt;0.001</b> | 0.75                  | 0.571    |
| Beta Modulation    | 0.00         | 0.962    | <b>6.05</b>     | <b>&lt;0.001</b> | 0.72                  | 0.595    |

Supplementary Table 3: Results of the Mixed Model ANOVA for ERD, ERS, and beta modulation peak latency.

|                    | Group        |              | Practice    |              | GroupXPractice |       |
|--------------------|--------------|--------------|-------------|--------------|----------------|-------|
|                    | F            | P            | F           | P            | F              | P     |
| <i>Left ROI</i>    |              |              |             |              |                |       |
| ERD                | 3.99         | 0.057        | 1.20        | 0.296        | 1.07           | 0.388 |
| ERS                | <b>9.78</b>  | <b>0.005</b> | <b>2.46</b> | <b>0.023</b> | 0.82           | 0.562 |
| <i>Frontal ROI</i> |              |              |             |              |                |       |
| ERD                | 4.20         | 0.052        | 0.91        | 0.516        | 0.61           | 0.777 |
| ERS                | <b>13.56</b> | <b>0.001</b> | 1.82        | 0.084        | 1.16           | 0.330 |
